# Supplementary material
Source: PubMed Central journal article supplement (PMC7075673)
Supplement: NIHMS1038221-supplement-1.pdf [file NIHMS1038221-supplement-1.pdf]

## Supplementary Tables and Figures

Supplementary Figure S1: Derivation of Analysis Sample and Head Injury Groups

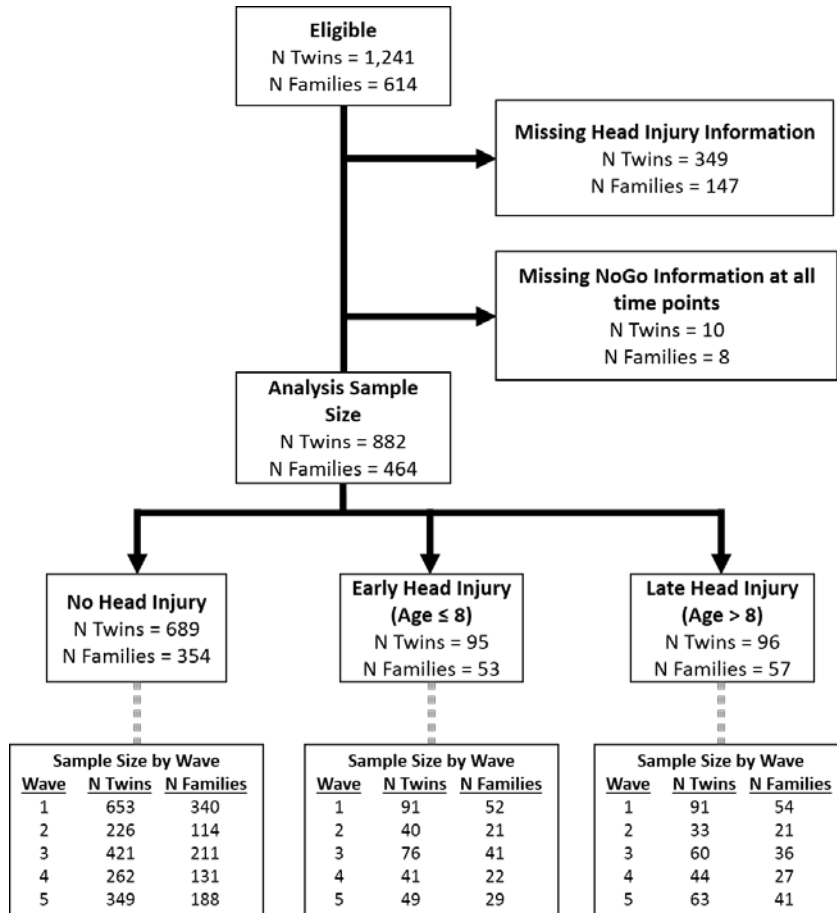

Supplementary Table S1: Attrition Analyses

| <b>Wave 1 Variables</b>      | <b>Not Missing<br/>Head Injury or<br/>NoGo<br/>Information<br/>N=882</b> | <b>Missing Head<br/>Injury or NoGo<br/>Information<br/>N=359</b> | <b>p-value</b> |
|------------------------------|--------------------------------------------------------------------------|------------------------------------------------------------------|----------------|
| <b>Age</b>                   | 9.6 ± 0.6                                                                | 9.6 ± 0.6                                                        | 0.66           |
| <b>Male</b>                  | 46%                                                                      | 57%                                                              | <.001          |
| <b>Monozygotic</b>           | 45%                                                                      | 51%                                                              | 0.04           |
| <b>Race</b>                  |                                                                          |                                                                  | 0.10           |
| <b>White</b>                 | 29%                                                                      | 22%                                                              |                |
| <b>Hispanic</b>              | 37%                                                                      | 39%                                                              |                |
| <b>Black</b>                 | 13%                                                                      | 16 %                                                             |                |
| <b>Asian</b>                 | 4%                                                                       | 6%                                                               |                |
| <b>Mixed/Other</b>           | 17%                                                                      | 17%                                                              |                |
| <b>§NoGo Errors</b>          | 45 ± 20                                                                  | 47 ± 20                                                          | 0.08           |
| <b>‡Reactive Aggression</b>  | 0.62 ± 0.32                                                              | 0.67 ± 0.34                                                      | 0.03           |
| <b>‡Proactive Aggression</b> | 0.06 ± 0.13                                                              | 0.11 ± 0.19                                                      | <.001          |

p-value from Welch's T-test or Fisher's exact

§N=837 vs 317

‡N=874 vs 342

Supplementary Table S2: Among those with Head Injury, Association of Age at First Head Injury with Change in Impulsivity and Aggression Scores over time

|                                          | $\Delta(\text{Wave 2- W1})$<br>Ages 11-13<br><i>b</i> (95% CI) | $\Delta(\text{Wave 3- W1})$<br>Ages 14-15<br><i>b</i> (95% CI) | $\Delta(\text{Wave 4- W1})$<br>Ages 16-18<br><i>b</i> (95% CI) | $\Delta(\text{Wave 5- W1})$<br>Ages 19-20<br><i>b</i> (95% CI) |
|------------------------------------------|----------------------------------------------------------------|----------------------------------------------------------------|----------------------------------------------------------------|----------------------------------------------------------------|
| <b>NoGo Errors</b>                       |                                                                |                                                                |                                                                |                                                                |
| <i>Age at 1<sup>st</sup> Head Injury</i> | -0.5 (-1.2, 0.2)                                               | *-1.0 (-1.6, -0.4)                                             | *-0.8 (-1.5, -0.1)                                             | -0.4 (-1.2, 0.3)                                               |
| <b>Reactive Aggression</b>               |                                                                |                                                                |                                                                |                                                                |
| <i>Age at 1<sup>st</sup> Head Injury</i> | *-0.013 (-0.023, -0.003)                                       | *-0.012 (-0.021, -0.003)                                       | -0.007 (-0.017, 0.003)                                         | *-0.013 (-0.024, -0.001)                                       |
| <b>Proactive Aggression</b>              |                                                                |                                                                |                                                                |                                                                |
| <i>Age at 1<sup>st</sup> Head Injury</i> | 0.001 (-0.004, 0.005)                                          | 0.001 (-0.003, 0.006)                                          | *0.005 (0.000, 0.009)                                          | 0.001 (-0.004, 0.006)                                          |

b=regression slope coefficient, CI=Confidence Interval

\*p-value < 0.05 for association of Age at 1<sup>st</sup> Head Injury with change from Wave 1. Models adjusted for baseline age, sex, race, and zygosity

Negative coefficients indicate that earlier head injuries are associated with higher levels of Impulsivity or Aggression
